# Supplementary material for: Dynamics of benzimidazole ethylphosphonate: a solid-state NMR study of anhydrous composite proton-conducting electrolytes
Source: Royal Society of Chemistry journal article supplement (doi:10.1039/c3cp53362j), 2013-01-01
Supplement: c3cp53362j.pdf [file c3cp53362j.pdf]

**Dynamics of Benzimidazole Ethylphosphonate: A Solid-State NMR Study of Anhydrous  
Composite Proton-Conducting Electrolytes**

Z. Blossom Yan, Nicole E. De Almeida, Jason W. Traer, and Gillian R. Goward\*

*\*Department of Chemistry and Chemical Biology & Brockhouse Institute for Materials  
Research, McMaster University, Hamilton, Ontario, Canada L8S 4M1*

### Supplementary Document

#### 1. Differential scanning calorimetry data for pristine solid acid

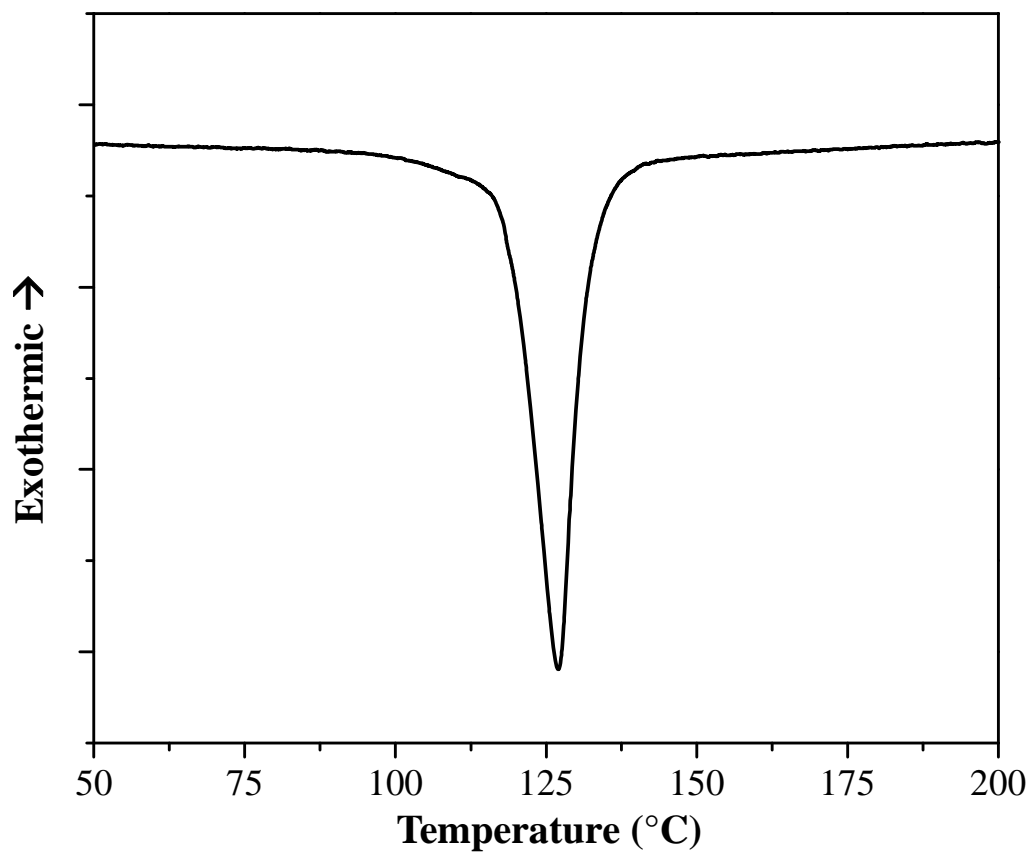

**Figure S1.** Differential scanning calorimetry for Bi-ePA:  $T_m = 127\text{ °C}$

## 2. Ionic conductivity analysis and calculation

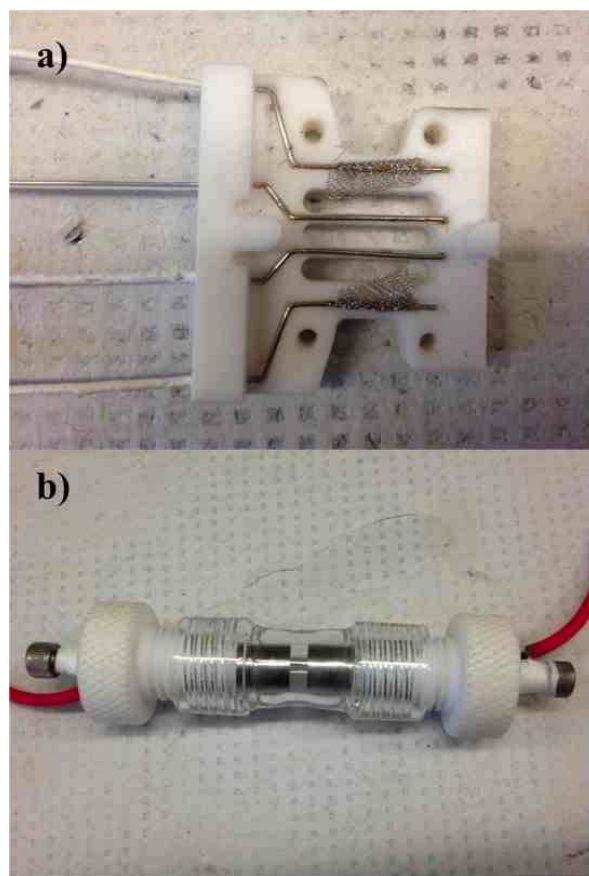

**Figure S2.** The impedance spectroscopy cell configurations used in this study. (a) The four-probe sample cell configuration with platinum electrodes. (b) Through-plane cell configuration with platinum electrodes.

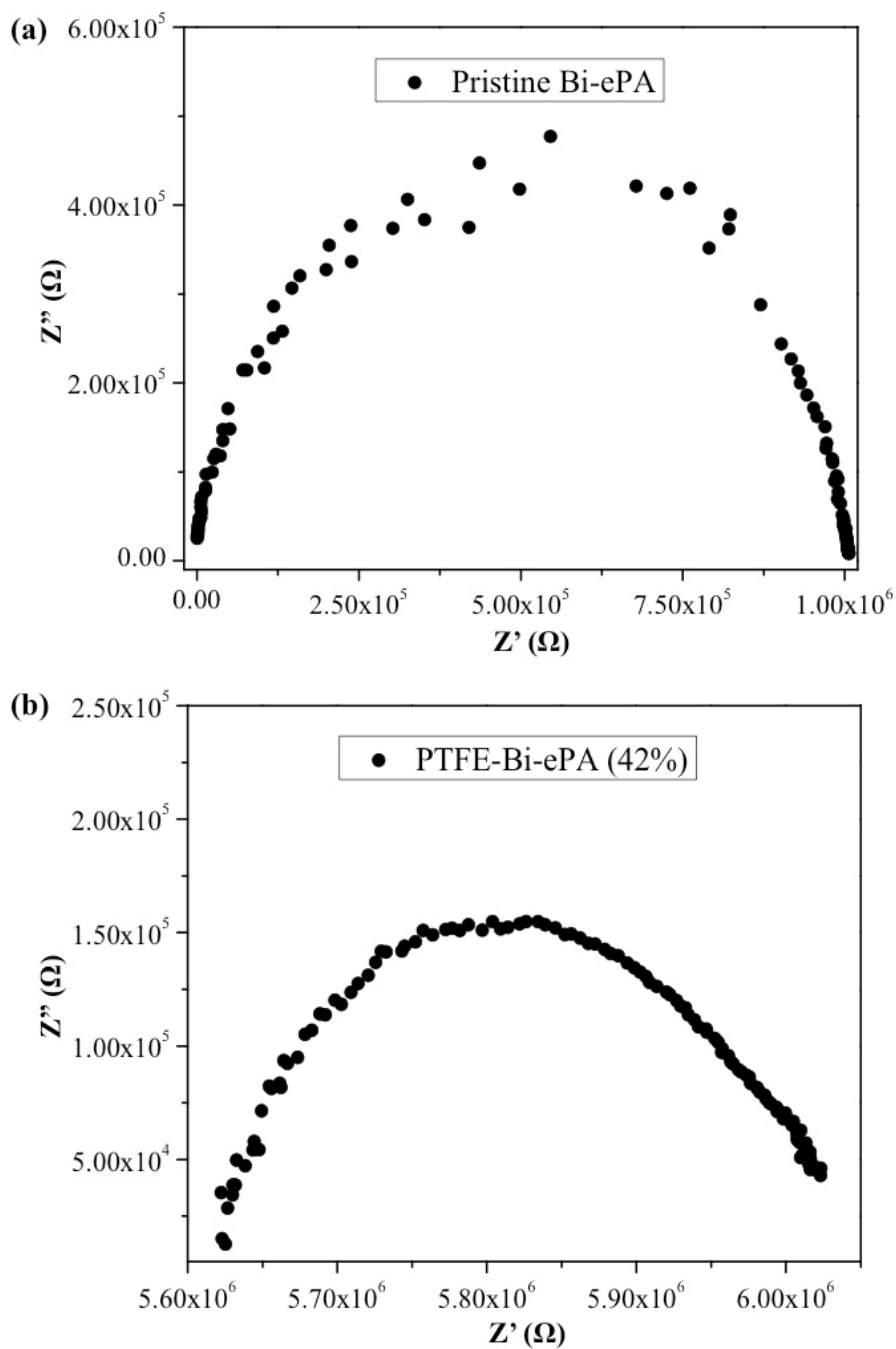

**Figure S3.** Nyquist plots at 90 °C of (a) a powder-compressed pellet of the Bi-ePA pristine salt and (b) 42 % loading membrane-salt composite. A Nyquist plot has the complex impedance on the y-axis with the real impedance on the x-axis.

The resistance of the material,  $R_m$ , can be extracted using ZView® software from Scribner Associates by fitting the data with semi-circular functions, which is the diameter of the semi-circle along  $Z'$ , x-axis. The conductivity,  $\sigma$ , is defined as the inverse of resistivity,  $\rho$ .

$$\sigma = \frac{1}{\rho}, \text{ and } \rho \text{ is defined as } R \times \frac{A}{l},$$

where  $R$  is the resistance of the material,  $A$  is the cross-section area of the material, and  $l$  is the length of the material.

In the in-plane four-probe cell configuration, the conductivity is calculated by,

$$\sigma = \frac{d}{R_m}, \text{ where } d \text{ is the thickness of the powder-pressed pellet.}$$

In the through-plane cell configuration, the conductivity is calculated by,

$$\sigma = \frac{l}{R_m \times A} = \frac{l}{R_m \times w \times d}, \text{ where } w \text{ is the width of the strip of the composite sample and } d \text{ is the thickness of the composite sample.}$$
